# Supplementary material
Source: publisher figshare collection journal article supplement (https://asha.figshare.com/articles/dataset/_/15079026)
Supplement: Supplementary file 2 [file 1]

**Supplemental Material S2. Data extraction form.**

|                                                                                         |  |
|-----------------------------------------------------------------------------------------|--|
| Title of article                                                                        |  |
| Authors, year                                                                           |  |
| Study population (diagnosis, ages, N)                                                   |  |
| Location of study (setting, country of origin)                                          |  |
| Aim(s) of study                                                                         |  |
| Disciplines involved                                                                    |  |
| Skills targeted                                                                         |  |
| Nonstandardized assessment methods used                                                 |  |
| Other forms of assessment methods used                                                  |  |
| Findings: Group differences                                                             |  |
| Findings: Comparing nonstandardized assessment scores to standardized assessment scores |  |
| Other findings/notes                                                                    |  |
